# Supplementary material for: Proteomics-based identification of different training adaptations of aged skeletal muscle following long-term high-intensity interval and moderate-intensity continuous training in aged rats
Source: publisher site journal article supplement (doi:10.18632/aging.102044), 2019-06-26
Supplement: Supplementary file [file aging-v11i12-102044-supplementary-material-SD1.pdf]

## SUPPLEMENTARY MATERIALS

### Supplementary Tables

**Supplementary Table 1. All antibody used for western blot analysis.**

| Target                 | Manufacturer | Product  | Primary |
|------------------------|--------------|----------|---------|
| ALDH2                  | Abcam        | ab108306 | 1:1000  |
| Sirtuin 3              | CST          | 2627     | 1:1000  |
| COX-IV                 | CST          | 4844     | 1:1000  |
| SDH                    | CST          | 11998    | 1:1000  |
| LC3A/B                 | CST          | 12741    | 1:1000  |
| ATG-3                  | CST          | 3415     | 1:1000  |
| Beclin-1               | CST          | 3495     | 1:1000  |
| Adiponectin Receptor 1 | Abcam        | ab126611 | 1:1000  |
| Adiponectin            | Abcam        | ab22554  | 1:1000  |
| Bax                    | Abcam        | ab32503  | 1:500   |
| Bcl-2                  | Abcam        | ab196495 | 1:500   |
| Caspase-3              | Abcam        | ab13847  | 1:500   |
| FOXO1                  | Abcam        | ab70382  | 1:1000  |
| p-FOXO1                | Abcam        | ab131339 | 1:1000  |
| GAPDH                  | CST          | 2118     | 1:1000  |

**Supplementary Table 2. The primer sequences used in reverse transcription-polymerase chain reaction.**

| Primers  | Forward (5'-3')       | Reverse (5'-3')          |
|----------|-----------------------|--------------------------|
| Dnaja2   | AAGAGGCGAGGACATGATGC  | CATAATGCGCACACCTCGAC     |
| Calnexin | GAATAGAATGCGGTGGTGC   | TGTGGCGAA AGATGA AATG    |
| Sypl2    | TACCTGCGCTTCCACAAAGT  | GCAGCAACCAGCCAAAAGAA     |
| JP1      | TCCTGAGTCAAGTCCCAAAC  | CCTCTGTCATCCTCCCTGT      |
| SOD2     | AGGGCCTGTCCCATGATGTC  | AGAAACCCGTTTGCCTCTACTGAA |
| FOXO1    | TCCTCGAACCAGCTCAAACG  | GGCGGTGCAAATGAATAGCAAG   |
| ADP      | GAGACGCAGGTGTTCTTGGT  | GGAACATTGGGGACAGTGAC     |
| ADPR1    | GTTGTACCCACCATGCACTTT | GGTTGGACACCCCATAGAAGT    |
| GAPDH    | TGCCGCCTGGAGAAACCTGC  | TGAGAGCAATGCCAGCCCCA     |

**Supplementary Table 3. Proteins with significantly altered abundance in red gastrocnemius between MICT and SED groups.**

| Protein IDs                                        | Description                                                       | Function                                            | Uniquepeptides | Folds | p-value |
|----------------------------------------------------|-------------------------------------------------------------------|-----------------------------------------------------|----------------|-------|---------|
| <b>Muscle contraction</b>                          |                                                                   |                                                     |                |       |         |
| A0A0G2K1V4                                         | myosin heavy chain 1, GN = Myh1                                   | muscle contraction                                  | 25             | 2.75  | 0.047   |
| D4A6M0                                             | synaptophysin-like 2, GN = Sypl2                                  | calcium ion homeostasis                             | 3              | 2.20  | 0.027   |
| D3ZQ55                                             | junctional protein 1, GN = Jph1                                   | calcium-release channel activity                    | 10             | 1.66  | 0.035   |
| A0A0G2K3E0                                         | aquaporin 1, GN = Aqp1                                            | maintenance of actin cytoskeleton polarity          | 2              | 1.81  | 0.046   |
| Q6IMZ5                                             | tropomodulin 1, GN = Tmod1                                        | muscle contraction                                  | 11             | 0.62  | 0.046   |
| D3ZGP9                                             | dehydrogenase 7C, GN= Dhrr7c                                      | regulation of release of calcium ion                | 12             | 0.46  | 0.046   |
| <b>Focal adhesion signaling</b>                    |                                                                   |                                                     |                |       |         |
| D4A3B0                                             | talin 2, GN = Tln2                                                | Actin filament binding                              | 8              | 3.82  | 0.046   |
| D3ZRN3                                             | actin beta-like 2, GN = Actb2                                     | ATP binding                                         | 3              | 2.49  | 0.046   |
| A0A0G2K013                                         | actinin alpha 4, GN = Actn4                                       | actin filament                                      | 2              | 3.28  | 0.029   |
| A0A0G2K3C8                                         | nidogen 2, GN = Nid2                                              | plasma membrane                                     | 5              | 0.56  | 0.047   |
| Q6AY56                                             | tubulin alpha 8, GN= Tuba8                                        | microtubule cytoskeleton organization               | 5              | 0.41  | 0.027   |
| <b>Mitochondrial metabolism</b>                    |                                                                   |                                                     |                |       |         |
| Q6PCT8                                             | succinate dehydrogenase complex subunit D,GN = Sdh                | TCA, succinate dehydrogenase complex                | 2              | 2.14  | 0.046   |
| Q5M9I5                                             | ubiquinol-cytochrome c reductase hinge protein,GN = Uqcrh         | ubiquinol-cytochrome-c reductase activity           | 3              | 1.95  | 0.035   |
| D4A565                                             | NADH:ubiquinone oxidoreductase subunit B5,GN = Ndufb5             | mitochondrial respiratory chain complex I           | 5              | 1.77  | 0.046   |
| Q66HP8                                             | solute carrier family 25 member 20,GN = Slc25a20                  | mitochondrial carnitine transport                   | 10             | 1.60  | 0.035   |
| D3ZD09                                             | cytochrome c oxidase subunit 6B1, GN = Cox6b1                     | mitochondrial TCA, cytochrome c oxidase             | 6              | 1.53  | 0.046   |
| A1L1J4                                             | pyruvate dehydrogenase phosphatase catalytic subunit 1, GN = Pdp1 | mitochondrion serine/threonine phosphatase activity | 6              | 0.61  | 0.046   |
| <b>Protein processing in endoplasmic reticulum</b> |                                                                   |                                                     |                |       |         |
| D3ZE72                                             | methionyl aminopeptidase 1, GN = Metap1                           | proteolysis                                         | 3              | 2.12  | 0.027   |

|                                   |                                                                    |                                              |   |      |       |
|-----------------------------------|--------------------------------------------------------------------|----------------------------------------------|---|------|-------|
| Q5M9H7                            | DnaJ heat shock protein family (Hsp40) member A2, GN = Dnaja2      | unfolded protein binding, chaperone          | 5 | 1.91 | 0.046 |
| P35565                            | Calnexin, GN = Canx                                                | unfolded protein binding                     | 5 | 0.61 | 0.050 |
| Q5XIP0                            | DnaJ heat shock protein family (Hsp40) member B4, GN = Dnajb4      | unfolded protein binding, chaperone binding  | 7 | 0.51 | 0.035 |
| <b>Apoptotic and regeneration</b> |                                                                    |                                              |   |      |       |
| G3V7U0                            | cysteine and glycine rich protein 3, GN = Csrp3                    | positive regulation myoblast differentiation | 7 | 2.78 | 0.046 |
| D3ZUC1                            | smoothelin-like 2, GN = Smtnl2                                     | myotubes differentiating                     | 5 | 1.55 | 0.046 |
| F1M8K                             | dystroglycan 1, GN = Dag1                                          | skeletal muscle tissue regeneration          | 9 | 1.53 | 0.046 |
| A0A0H2UHF6                        | ADP-ribosylation like GTPase 6 interacting protein 5, GN = Arl6ip5 | negative regulation of apoptotic             | 4 | 1.51 | 0.046 |
| Q6AXS5                            | Serpine1 mRNA binding protein 1, GN = Serbp1                       | regulation of apoptotic process              | 3 | 0.44 | 0.047 |
| <b>Anti-oxidation</b>             |                                                                    |                                              |   |      |       |
| P07895                            | superoxide dismutase 2, GN = Sod2                                  | age-dependent response to ROS                | 8 | 1.55 | 0.046 |
| P51635                            | aldo-keto reductase family 1 member A1, GN = Akr1a1                | aldehyde catabolic process                   | 4 | 0.60 | 0.046 |
| R4GNK3                            | thioredoxin 1, GN = Txn1                                           | thioredoxin-disulfide reductase activity     | 3 | 0.35 | 0.047 |

Note. Student's t-test, corrected for false discovery rate with Benjamini-Hochberg method was applied to normalized expression data to identify DEPs.  $p < 0.05$  was set as the nominal significance cutoff, resulting in 29 proteins. The ratio MICT/SED represents the fold change in protein expression levels between the MICT and SED groups, reflecting proteins that were upregulated ( $> 1.5$ ) or downregulated ( $< 0.677$ ) in the MICT group.

**Supplementary Table 4. Proteins with significantly altered abundance in red gastrocnemius between HIIT and SED groups.**

| Protein IDs               | Description                      | Function                                                | Unique peptides | Folds | <i>p</i> -value |
|---------------------------|----------------------------------|---------------------------------------------------------|-----------------|-------|-----------------|
| <b>Muscle contraction</b> |                                  |                                                         |                 |       |                 |
| D4A6M0                    | synaptophysin-like 2, GN = Sypl2 | cellular calcium ion homeostasis                        | 3               | 1.95  | 0.023           |
| P0DP29                    | calmodulin 2, GN = Calm2         | negative regulation of calcium-release channel activity | 11              | 1.65  | 0.031           |
| D3ZQ55                    | junctophilin 1, GN = Jph1        | calcium-release channel activity                        | 10              | 1.61  | 0.027           |

|                                   |                                                                   |                                                      |    |      |       |
|-----------------------------------|-------------------------------------------------------------------|------------------------------------------------------|----|------|-------|
| A0A140TAF0                        | tropomyosin 3, GN = Tpm3                                          | muscle contraction                                   | 7  | 0.58 | 0.034 |
| <b>Focal adhesion signaling</b>   |                                                                   |                                                      |    |      |       |
| D3ZRN3                            | actin, beta-like 2, GN = Actbl2                                   | ATP binding                                          | 3  | 2.64 | 0.027 |
| P60711                            | actin, beta, GN = Actb                                            | ATP binding                                          | 8  | 1.50 | 0.018 |
| <b>Mitochondrial metabolism</b>   |                                                                   |                                                      |    |      |       |
| F1LZW6                            | solute carrier family 25 member 13, GN = Slc25a13                 | L-glutamate transmembrane transporter activity       | 2  | 2.29 | 0.032 |
| Q5M9I5                            | ubiquinol-cytochrome c reductase hinge protein, GN = Uqcrh        | ubiquinol-cytochrome-c reductase activity            | 3  | 1.79 | 0.024 |
| P11662                            | mitochondrially encoded NADH dehydrogenase 2, GN = Mt-nd2         | NADH dehydrogenase (ubiquinone) activity             | 2  | 1.70 | 0.027 |
| O88989                            | malate dehydrogenase 1, GN = Mdh1                                 | malate dehydrogenase activity, TCA                   | 14 | 1.52 | 0.027 |
| P25409                            | glutamic--pyruvic transaminase, GN = Gpt                          | L-alanine:2-oxoglutarate aminotransferase activity   | 15 | 1.51 | 0.024 |
| P13221                            | glutamic-oxaloacetic transaminase 1, GN = Got1                    | negative regulation of collagen biosynthetic process | 23 | 1.52 | 0.027 |
| A1L1J4                            | pyruvate dehydrogenase phosphatase catalytic subunit 1, GN = Pdp1 | mitochondrion serine/threonine phosphatase activity  | 6  | 0.64 | 0.034 |
| D4A9D8                            | oxysterol binding protein, GN = Osbp                              | sterol transporter activity                          | 3  | 0.55 | 0.027 |
| <b>Apoptotic and regeneration</b> |                                                                   |                                                      |    |      |       |
| Q5XIG8                            | serine/threonine kinase receptor associated protein, GN = Strap   | negative regulation of TGF beta receptor pathway     | 6  | 1.57 | 0.040 |
| D3ZUC1                            | smoothelin-like 2, GN = Smtnl2                                    | myotubes differentiating                             | 5  | 1.51 | 0.034 |
| F1M454                            | tubby-like protein 3, GN = Tulp3                                  | phosphatidylinositol binding                         | 2  | 1.77 | 0.034 |
| A0A0G2K654                        | histone cluster 1 H1 family member c, GN = Hist1h1c               | cooperates with various proapoptotic proteins        | 2  | 0.63 | 0.034 |
| G3V9M6                            | fibrillin 1, GN = Fbn1                                            | skeletal muscle system development                   | 33 | 0.67 | 0.042 |
| <b>Autophagy</b>                  |                                                                   |                                                      |    |      |       |

|                       |                                                           |                                               |   |      |       |
|-----------------------|-----------------------------------------------------------|-----------------------------------------------|---|------|-------|
| A0A0G2K845            | adiponectin, GN = ADP                                     | adiponectin-activated signaling pathway       | 2 | 2.50 | 0.027 |
| Q6P6T6                | SEC22 homolog B, vesicle trafficking protein, GN = Sec22b | autophagosome assembly                        | 8 | 1.56 | 0.024 |
| <b>Anti-oxidation</b> |                                                           | negative regulation of autophagosome assembly | 3 | 0.55 | 0.024 |
| P07895                | superoxide dismutase 2, GN = sod2                         |                                               |   |      |       |
| P08009                | glutathione S-transferase mu 2, GN = Gstm2                | age-dependent response to ROS                 | 8 | 2.00 | 0.027 |
| <b>Other</b>          |                                                           |                                               | 3 | 1.54 | 0.024 |
| F1M013                | ribosomal protein L7a, GN = Rpl7a                         |                                               |   |      |       |
| Q4V8F6                | poly(rC) binding protein 2, GN = Pcbp2                    | ribosome biogenesis                           | 7 | 0.55 | 0.034 |
|                       |                                                           | C-rich single-stranded DNA binding            | 2 | 0.45 | 0.027 |

Note. Student's t-test, corrected for false discovery rate with Benjamini-Hochberg method was applied to normalized expression data to identify DEPs.  $p < 0.05$  was set as the nominal significance cutoff, resulting in 26 proteins. The ratio HIIT/SED represents the fold change in protein expression levels between the HIIT and SED groups, reflecting proteins that were upregulated ( $> 1.5$ ) or downregulated ( $< 0.677$ ) in the HIIT group.

**Supplementary Table 5. Proteins involved in KEGG pathways significantly enriched in the MICT/HIIT groups.**

| Map_ID              | Map_name                                    | Protein name                                      | Trend | <i>p</i> value | FDR   | Enrichment Factor |
|---------------------|---------------------------------------------|---------------------------------------------------|-------|----------------|-------|-------------------|
| <b>MICT vs. SED</b> |                                             |                                                   |       |                |       |                   |
| <b>rno04141</b>     | Protein processing in endoplasmic reticulum | DnaJ heat shock protein family (Hsp40) member A2  | Down  | 0.037          | 0.590 | 0.180             |
|                     |                                             | Calnexin                                          |       |                |       |                   |
|                     |                                             | DnaJ heat shock protein family (Hsp40) member B12 |       |                |       |                   |
|                     |                                             | Sec23 homolog A, coat complex II component        |       |                |       |                   |
|                     |                                             | Ribophorin II                                     |       |                |       |                   |
| <b>rno04068</b>     | FOXO signaling pathway                      | Superoxide dismutase 2                            | Over  | 0.014          | 0.500 | 0.310             |
|                     |                                             | Solute carrier family 2 member 4                  |       |                |       |                   |
|                     |                                             | Growth factor receptor bound protein 2            |       |                |       |                   |
|                     |                                             | Mitogen activated protein kinase kinase 1         |       |                |       |                   |
|                     |                                             |                                                   |       |                |       |                   |
| <b>HIIT vs SED</b>  |                                             |                                                   |       |                |       |                   |
| <b>rno04920</b>     | Adipocytokine signaling pathway             | Adiponectin                                       | Over  | 0.036          | 0.580 | 0.270             |
|                     |                                             | Solute carrier family 2 member 4                  |       |                |       |                   |
|                     |                                             | Acetyl-CoA carboxylase beta                       |       |                |       |                   |
| <b>rno04068</b>     | FOXO signaling pathway                      | Superoxide dismutase 2                            | Over  | 0.050          | 0.580 | 0.230             |
|                     |                                             | Solute carrier family 2 member 4                  |       |                |       |                   |
|                     |                                             | Homer scaffold protein 1                          |       |                |       |                   |
